# Supplementary material for: The Effect of Atm Loss on Radiosensitivity of a Primary Mouse Model of Pten-Deleted Brainstem Glioma
Source: MDPI journal article supplement (doi:10.3390/cancers14184506), 2022-09-17
Supplement: s1 [file s1]

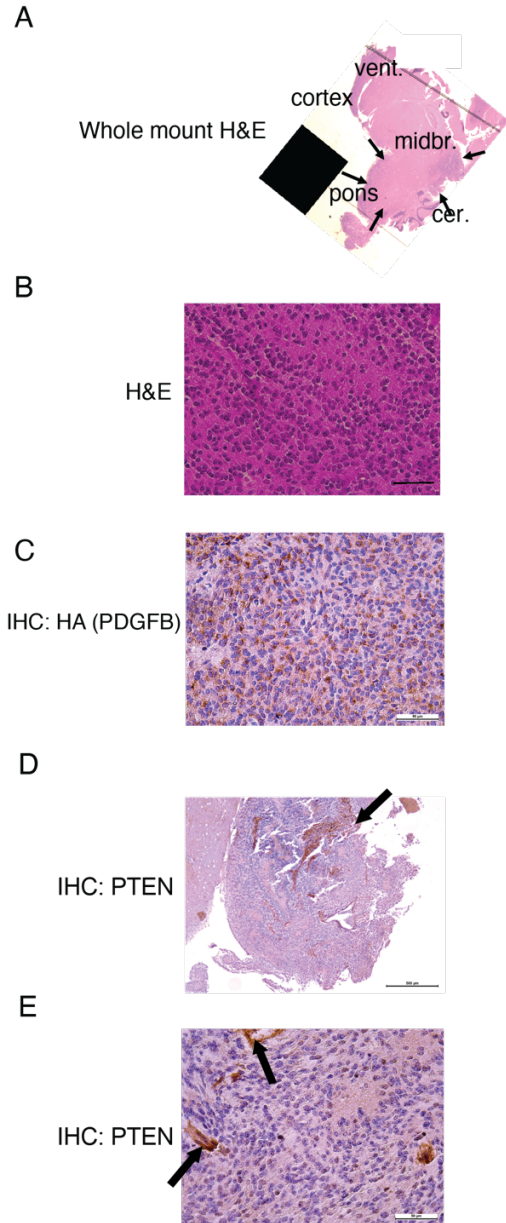

**Supplementary Figure S1. Characterization of nPtenA<sup>FL/+</sup> brainstem gliomas.**

(A) Whole-mount H&E slide showing expansile tumors in the brainstem of nPtenA<sup>FL/+</sup> mice. Midbr., midbrain; vent, lateral ventricle; cer., cerebellum.

(B) Magnified H&E slides for tumors from nPtenA<sup>FL/+</sup> mice. Scale bar represents 50  $\mu$ m.

(C) Immunohistochemistry staining for HA-tagged PDGFB in tumors from nPtenA<sup>FL/+</sup> mice. Scale bar represents 50  $\mu$ m.

(D) 5X mount showing immunohistochemistry for PTEN of tumors centered in the brainstem (pons) with lack of PTEN reactivity, and diffuse infiltrating borders (arrows) for tumors from nPtenA<sup>FL/+</sup> mice. Scale bar represents 500  $\mu$ m.

(E) 40X mount shows complete loss of PTEN in tumor cells but not normal blood vessels (arrows) in nPtenA<sup>FL/+</sup> mice. Scale bar represents 50  $\mu$ m.
